# Supplementary material for: Advanced Glycation End Product Accumulation in Subjects with Open-Angle Glaucoma with and without Exfoliation
Source: PubMed Central journal article supplement (PMC7465686; doi:10.3390/antiox9080755), 2020-08-15
Supplement: antioxidants-09-00755-s001.pdf [file antioxidants-09-00755-s001.pdf]

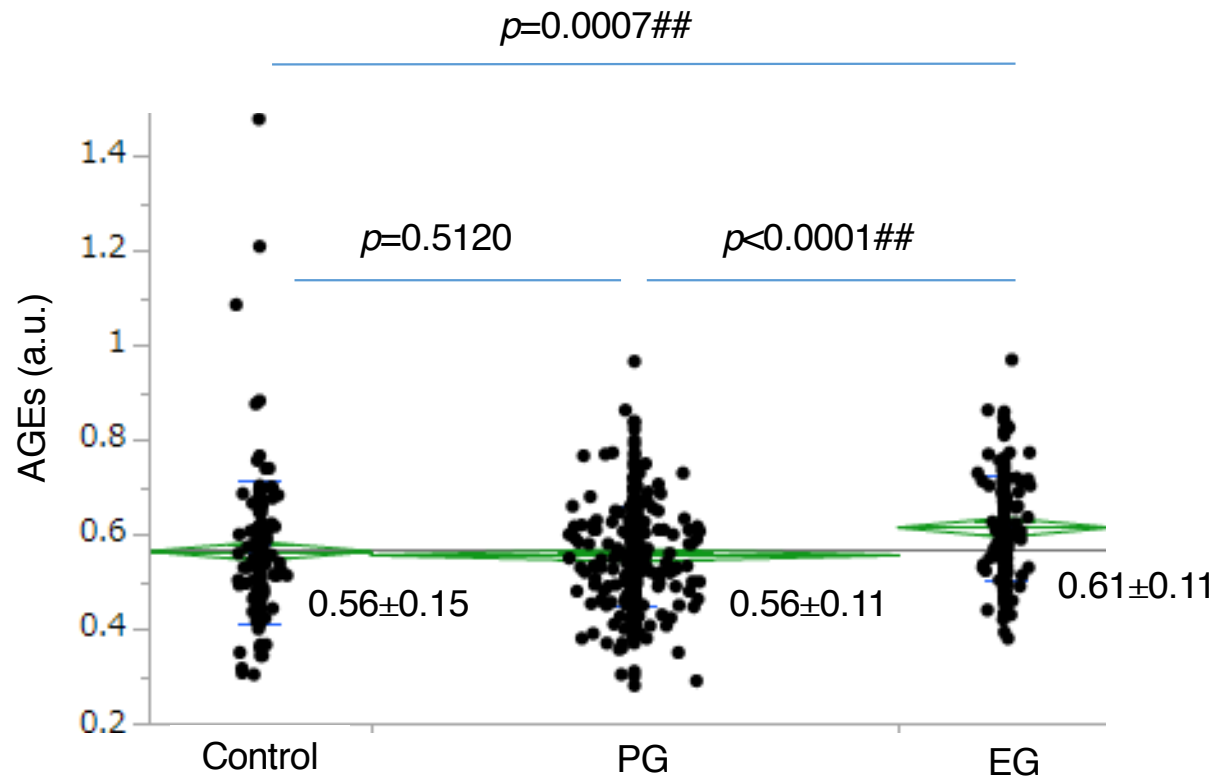

**Figure S1.** Distribution of advanced glycation endproducts (AGEs) in each disease group. The  $p$  values of the post-hoc pair comparisons are calculated by the unpaired t-test. The ## correspond to the significance levels at 1% ( $p<0.0033$ ) by Bonferroni correction for multiple comparisons by the unpaired t-test among three comparison groups. PG, primary open-angle glaucoma group; EG, exfoliation glaucoma group; a.u., arbitrary units.
